# Supplementary material
Source: Research Square preprint supplement (doi:10.21203/rs.3.rs-9494753/v1)
Supplement: Supplementary file 1 [file fa68cdc948ffc24b72afe36c.docx]

**Conjugated Ferrocenes: Structure–Redox–Activity Relationships from Synthesis, Electrochemical, Computational, and Biological Studies**

Asma Ghazzy*a**, Khaled Al Khalyfeh*b*, Hamdi Nsairat*a*, Bayan Aburas *a*, Rima Al Omari*c*, Walhan Alshaer*d*, Deeb Taher*e*, Yasser Mahmoud Aboelmagd*f, g*,Heinrich Lang*h*

*a* Faculty of Pharmacy, Al-Ahliyya Amman University, Amman 19328, Jordan.

*b* Department of Chemistry, Faculty of Natural Sciences, Al-Hussein Bin Talal University, Ma’an 71111, Jordan.

*c* Faculty of Allied Medical Sciences, Al-Ahliyya Amman University, Amman 19328, Jordan.

*d* Pharmacological and Diagnostic Research Center, Al-Ahliyya Amman University, Amman 19328, Jordan.

*e* Department of Chemistry, School of Science, The University of Jordan, Amman 11942, Jordan.

*f* Technische Universität Chemnitz, Research Centre for Materials, Architectures and Integration of Nanomembranes (MAIN), Research Group Organometallics, Rosenbergstraße 6, D-09126 Chemnitz, Germany.

* Corresponding author. Email: a.alghazzy@ammanu.edu.jo; phone: +962 777721721

Table of Contents

| **Figure S1.** | Infrared spectrum (KBr) of **1**. | 4 |
| --- | --- | --- |
| **Figure S2.** | Infrared spectrum (KBr) of **2**. | 4 |
| **Figure S3.** | Infrared spectrum (KBr) of **3**. | 5 |
| **Figure S4.** | Infrared spectrum (KBr) of **4**. | 5 |
| **Figure S5.** | 1H NMR spectrum (CDCl3, 25 oC, 500.303 MHz) of **1**. | 6 |
| **Figure S6.** | 1H NMR spectrum (CDCl3, 25 oC, 500.303 MHz) of **2**. | 6 |
| **Figure S7.** | 1H NMR spectrum (CDCl3, 25 oC, 500.303 MHz) of **3**. | 7 |
| **Figure S8.** | 1H NMR spectrum (CDCl3, 25 oC, 500.303 MHz) of **4**. | 7 |
| **Figure S9.** | 13C{1H} NMR spectrum (CDCl3, 25 oC, 125.813 MHz MHz) of **1**. | 8 |
| **Figure S10.** | 13C{1H} NMR spectrum (CDCl3, 25 oC, 125.813 MHz MHz) of **2**. | 8 |
| **Figure S11.** | 13C{1H} NMR spectrum (CDCl3, 25 oC, 125.813 MHz MHz) of **3**. | 9 |
| **Figure S12.** | 13C{1H} NMR spectrum (CDCl3, 25 oC, 125.813 MHz MHz) of **4**. | 9 |

**Figure S1.** Infrared spectrum (KBr) of **1.**

**Figure S2.** Infrared spectrum (KBr) of **2.**

**Figure S3.** Infrared spectrum (KBr) of **3.**

**Figure S4.** Infrared spectrum (KBr) of **4.**

**Figure S5.** 1H NMR spectrum (CDCl3, 25 oC, 500.303 MHz) of **1**.

**Figure S6.** 1H NMR spectrum (CDCl3, 25 oC, 500.303 MHz) of **2**.

**Figure S7.** 1H NMR spectrum (CDCl3, 25 oC, 500.303 MHz) of **3**.

**Figure S8.** 1H NMR spectrum (CDCl3, 25 oC, 500.303 MHz) of **4**.

**Figure S9.** 13C{1H} NMR spectrum (CDCl3, 25 oC, 125.813 MHz MHz) of **1**.

**Figure S10.** 13C{1H} NMR spectrum (CDCl3, 25 oC, 125.813 MHz MHz) of **2**.

**Figure S11.** 13C{1H} NMR spectrum (CDCl3, 25 oC, 125.813 MHz MHz) of **3**.

**Figure S12.** 13C{1H} NMR spectrum (CDCl3, 25 oC, 125.813 MHz MHz) of **4**.
